# Supplementary material for: Unusual Hemiaulus Bloom Influences Ocean Productivity in Northeast U.S. Shelf Waters
Source: Copernicus journal article supplement (doi:10.5194/bg-2023-153), 2023-09-18
Supplement: Supplementary file 1 [file bg-2023-153-supplement.pdf]

## Supplemental Material for:

### Unusual *Hemiaulus* Bloom Influences Ocean Productivity in Northeast U.S. Shelf Waters

S. Alejandra Castillo Cieza<sup>1</sup>, Rachel H.R. Stanley<sup>1\*</sup>, Pierre Marrec<sup>2</sup>, Diana N. Fontaine<sup>2</sup>, E. Taylor Crockford<sup>3</sup>, Dennis J. McGillicuddy Jr.<sup>3</sup>, Arshia Mehta<sup>1</sup>, Susanne Menden-Deuer<sup>2</sup>, Emily E. Peacock<sup>3</sup>, Tatiana A. Rynearson<sup>2</sup>, Zoe O. Sandwith<sup>3,4</sup>, Weifeng (Gordon) Zhang<sup>3</sup>, and Heidi M. Sosik<sup>3</sup>

<sup>1</sup>Chemistry Department, Wellesley College, Wellesley, 02481, USA

<sup>2</sup>Graduate School of Oceanography, University of Rhode Island, Narragansett, 02882, USA

<sup>3</sup>Woods Hole Oceanographic Institution, Woods Hole, MA, 02543, USA

<sup>4</sup>Now at the Hakai Institute, Pruth Harbour, Calvert Island, BC, Canada

\*Correspondence to: Rachel H. R. Stanley (rachel.stanley@wellesley.edu)

**Table S1.** Mixed layer depths, in m, for each NES-LTER station (listed in the top row) for all the summer NES-LTER cruises used in this paper. The starting month and year of the cruise are listed next to the cruise name.

| Cruise ID | Cruise starting date | L1 | L2 | L3 | L4 | L5 | L6 | L7 | L8 | L9 | L10 |
|-----------|----------------------|----|----|----|----|----|----|----|----|----|-----|
| EN617     | 7/2018               | 6  | 6  | 8  | 6  | 10 | 9  | 16 | 15 | 14 | 13  |
| EN644     | 8/2019               | 5  | 6  | 6  | 10 | 9  | 6  | 7  | 16 | 6  | 15  |
| EN655     | 7/2020               | 6  | 8  | 6  | 9  | 7  | 7  | 7  | —  | 6  | 10  |
| EN668     | 7/2021               | 6  | 6  | 9  | 6  | 9  | 13 | 13 | 10 | 10 | 9   |
| EN687     | 7/2022               | 7  | 7  | 9  | 6  | 10 | 11 | 15 | 11 | 7  | 9   |

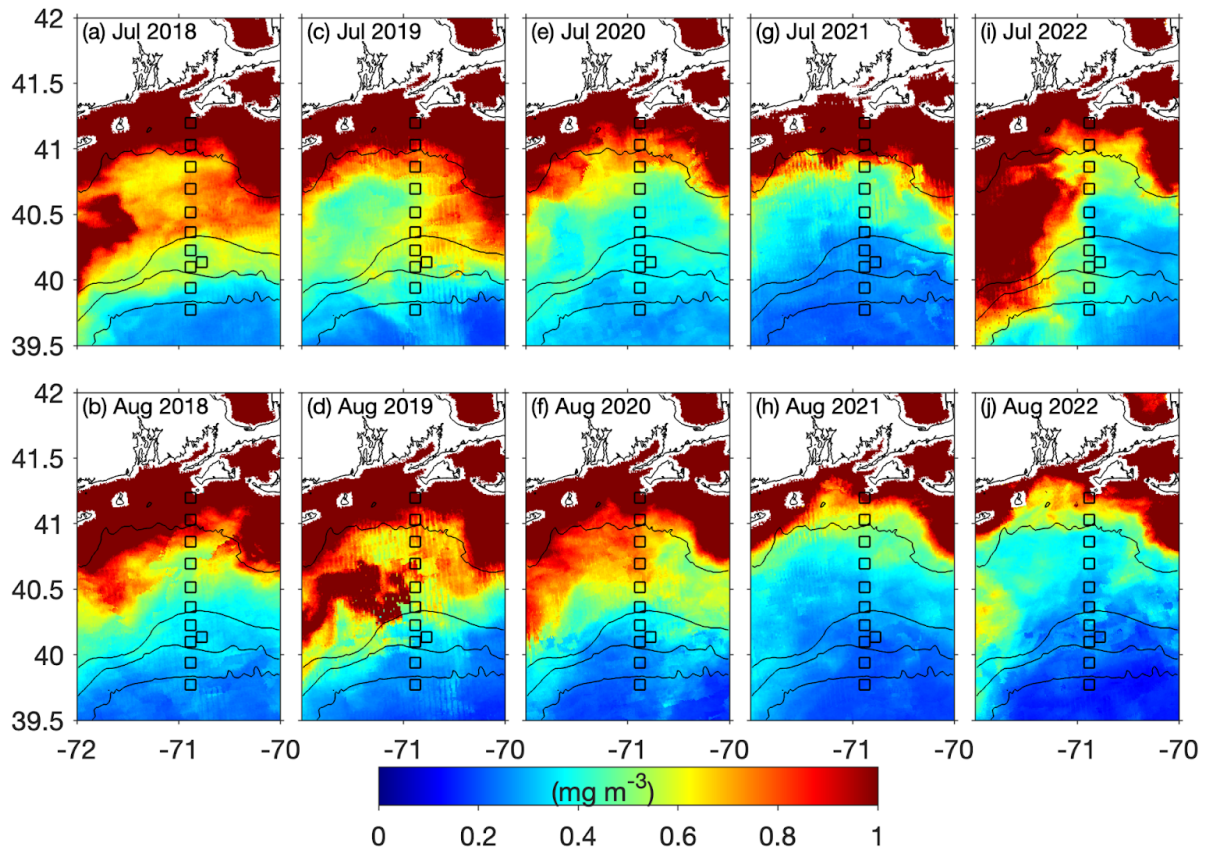

**Fig S1.** Monthly mean sea surface chlorophyll concentration on the New England shelf in July and August of 2018-2022. The squares mark CTD stations and the black lines are bathymetric contours corresponding to 50, 100, 200, 1000 m.

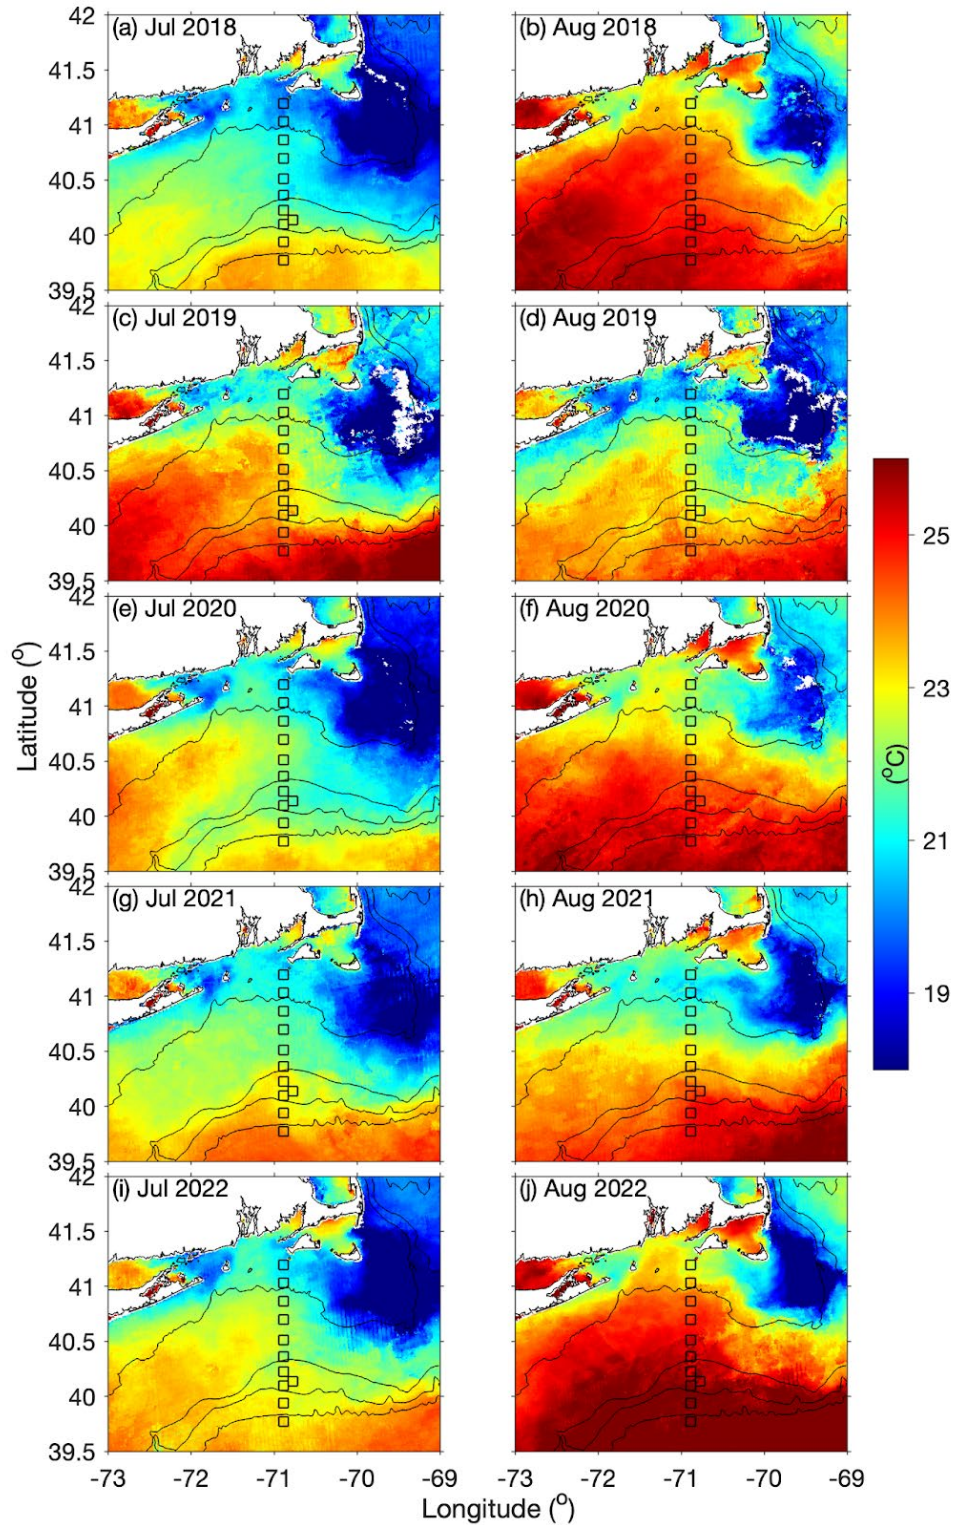

**Fig S2.** Monthly mean sea surface temperature on the New England shelf in July and August, 2018-2022. The square symbols are CTD stations; the black lines are bathymetric contours of 50, 100, 200, 1000 m.

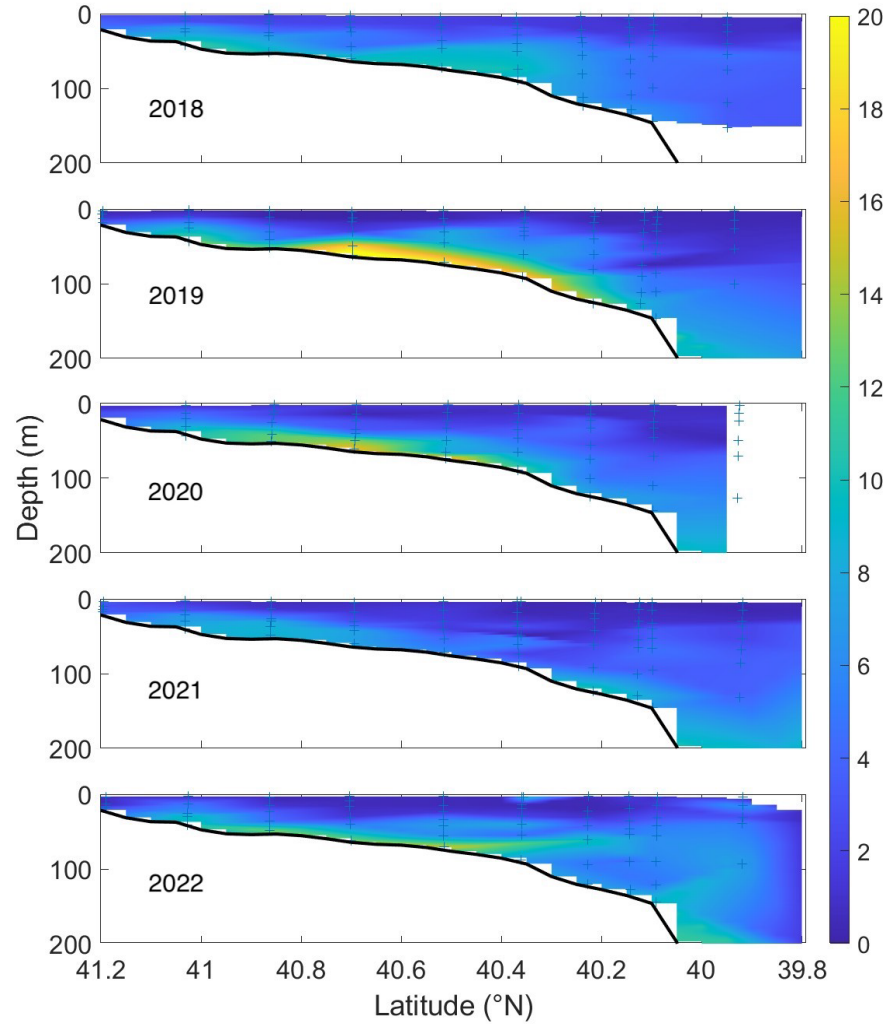

**Fig S3.** Silicate concentration as a function of depth and latitude for the NES-LTER summer cruises 2018-2022 (from top to bottom).



=

Backward particle trajectories from 2019-08-21 to 2019-07-22

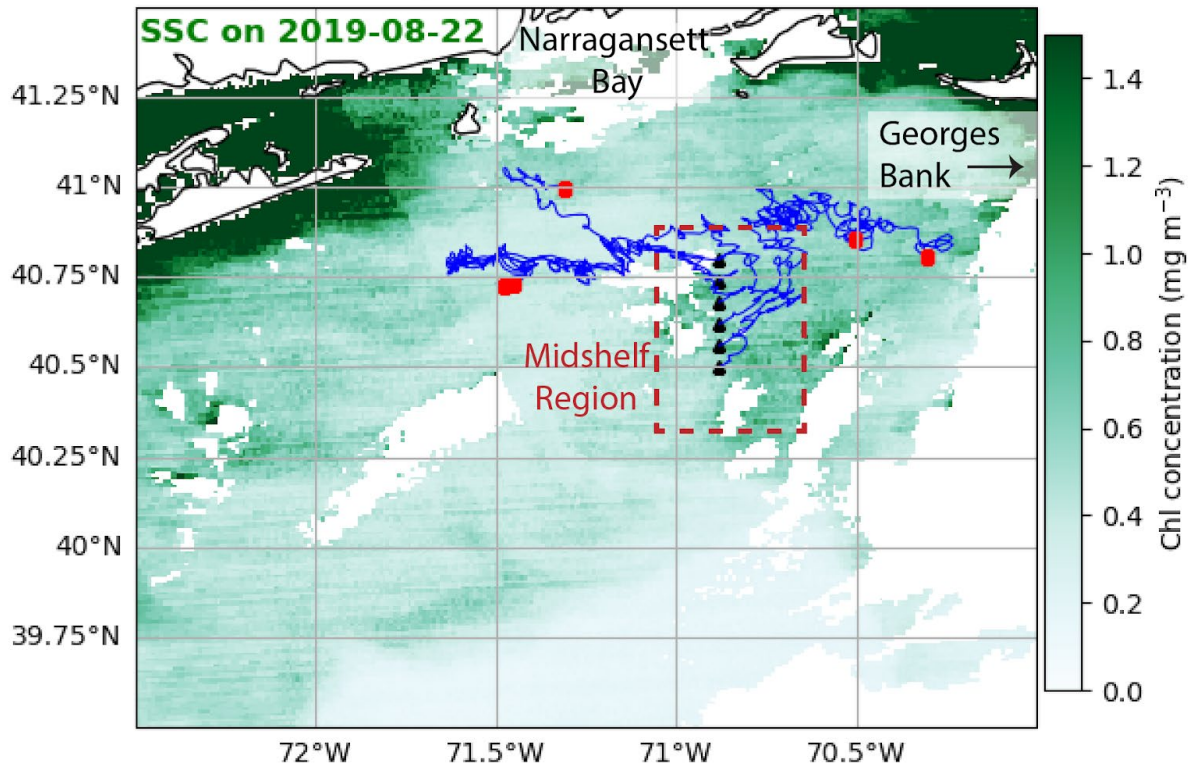

**Fig S4.** Backward particle trajectories beginning along the mid-shelf stations from the NES-LTER transect line (shown in black triangles) on Aug 21, 2019 suggest that the *Hemiaulus* bloom water came from the inner shelf region near Narragansett Bay and Georges Bank rather than mid-shelf region further South. The red squares indicate the positions of the particles on Jul 22, 2019. The background color shows the satellite-measured surface chlorophyll concentration on Aug 22, 2019.
